# Supplementary material
Source: Springer Nature journal article supplement (https://www.springermedizin.de/resource/supplementary/12889_2013_5961_MOESM6_ESM.pdf/9493988)

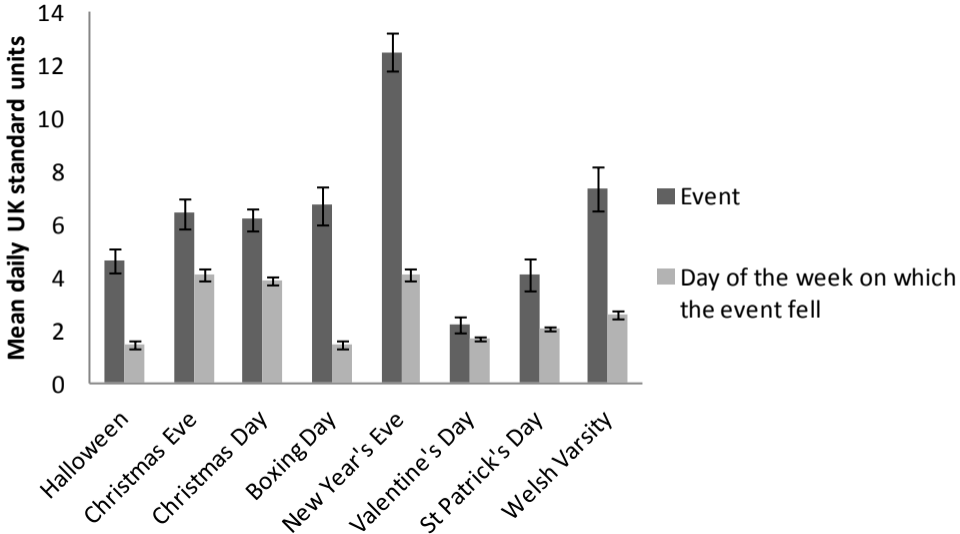

Supplement: MOESM6 [file 9493988]
